# Supplementary material for: Synthesis and Antiproliferatory Activities Evaluation of Multi-Substituted Isatin Derivatives
Source: MDPI journal article supplement (doi:10.3390/molecules26010176), 2020-12-31
Supplement: s1 [file s1]

## Synthesis and Antiproliferation Activities Evaluation of Multi-substituted Isatin Derivatives

Ying Ding<sup>a,†</sup>, Lianbo Zhao<sup>a,†</sup>, Ying Fu<sup>a</sup>, Lei Hao<sup>a</sup>, Yupeng Fu<sup>a</sup>, Yuan Yuan<sup>a</sup>, Peng Yu<sup>a,\*</sup>, Yuou Teng<sup>a,\*</sup>

<sup>a</sup>. China International Science and Technology Cooperation Base of Food Nutrition/Safety and Medicinal Chemistry, Tianjin University of Science and Technology, Tianjin 300457.

<sup>†</sup> These authors contributed equally to this work.

\* Corresponding author.

### Supplementary content:

1. Structure of the Intermediates.....S2
2. Spetrum Data.....S3-17
3. HR-MS Spectrum Data of new compound **4l,4m,4o**.....S18-S20



## 1. Structure of the Intermediates

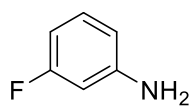

1a

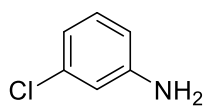

1b

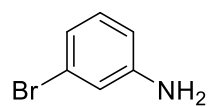

1c

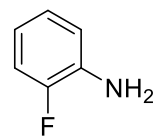

1d

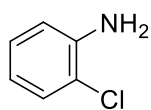

1e

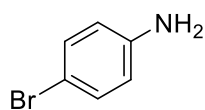

1f

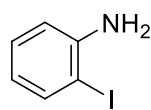

1g

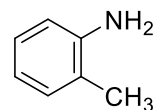

1h

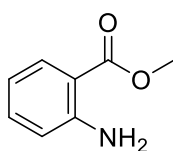

1i

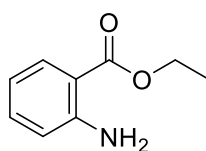

1j

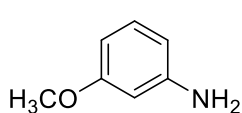

1k

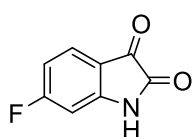

3a

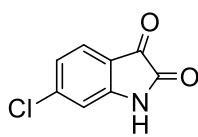

3b

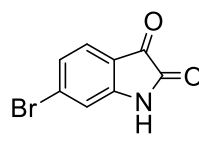

3c

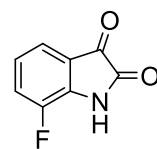

3d

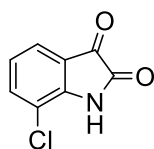

3e

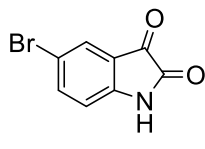

3f

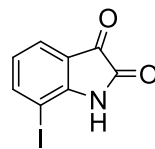

3g

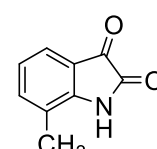

3h

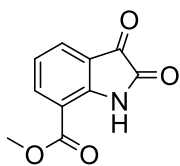

3i

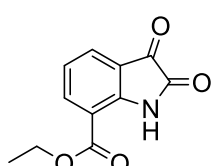

3j

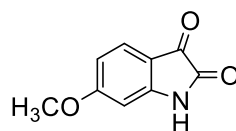

3k

## 2. Spectra Data

Spectra data are shown from the next page.



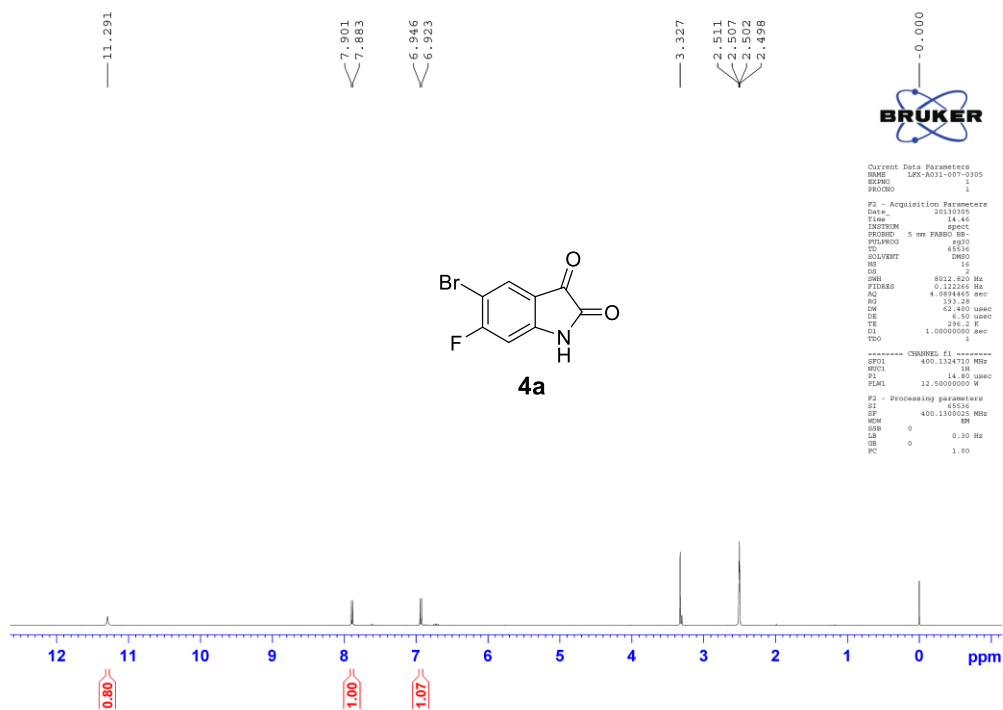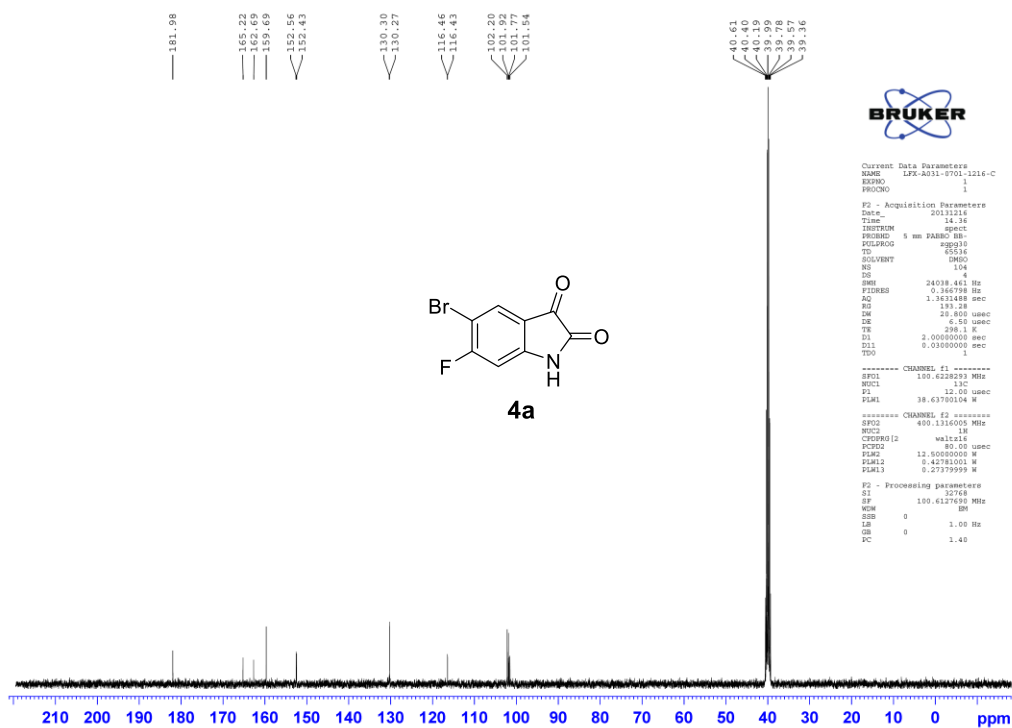



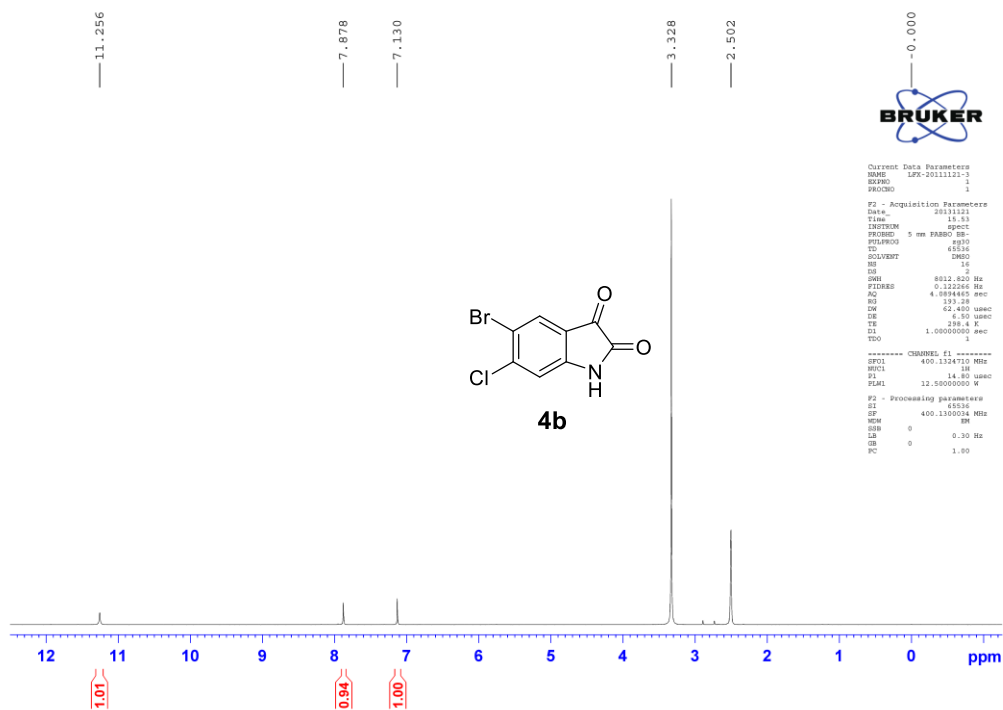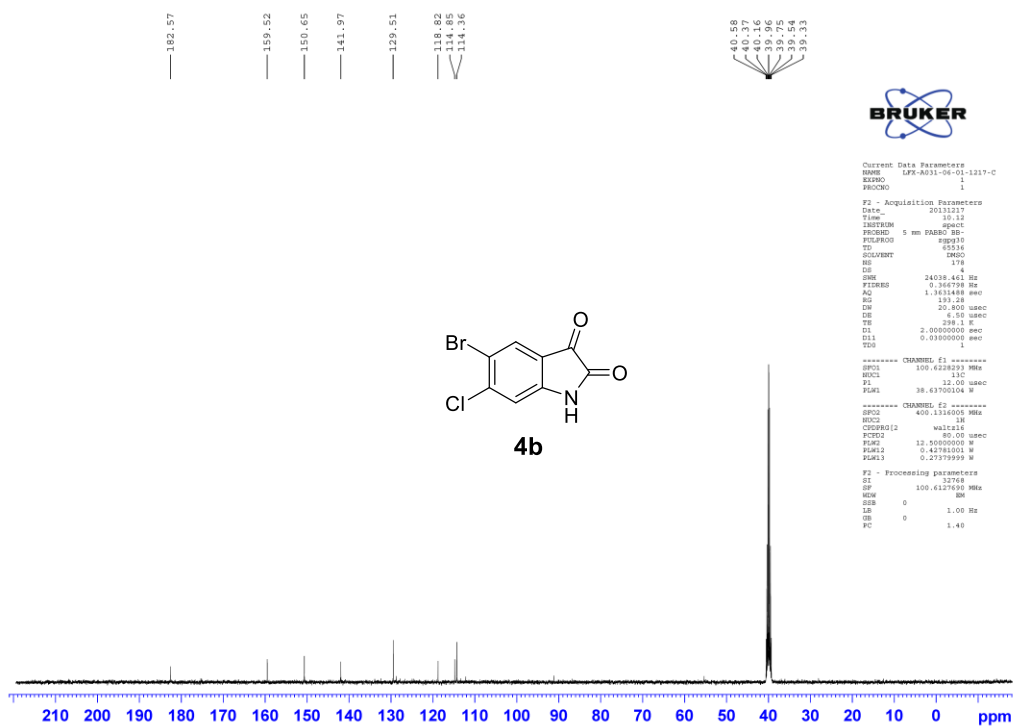



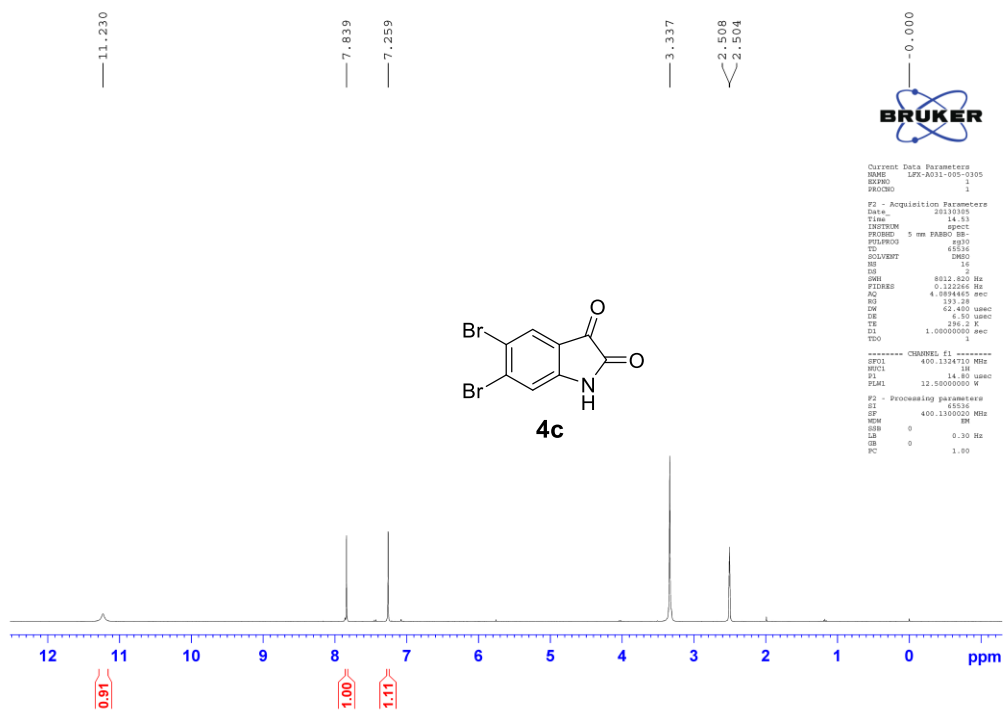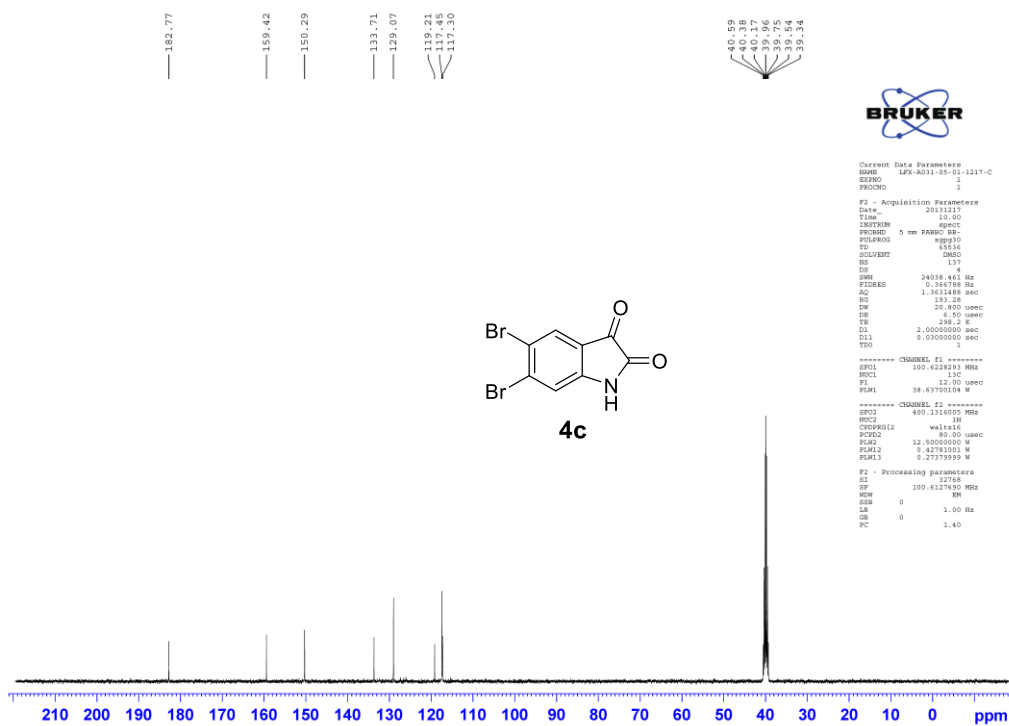



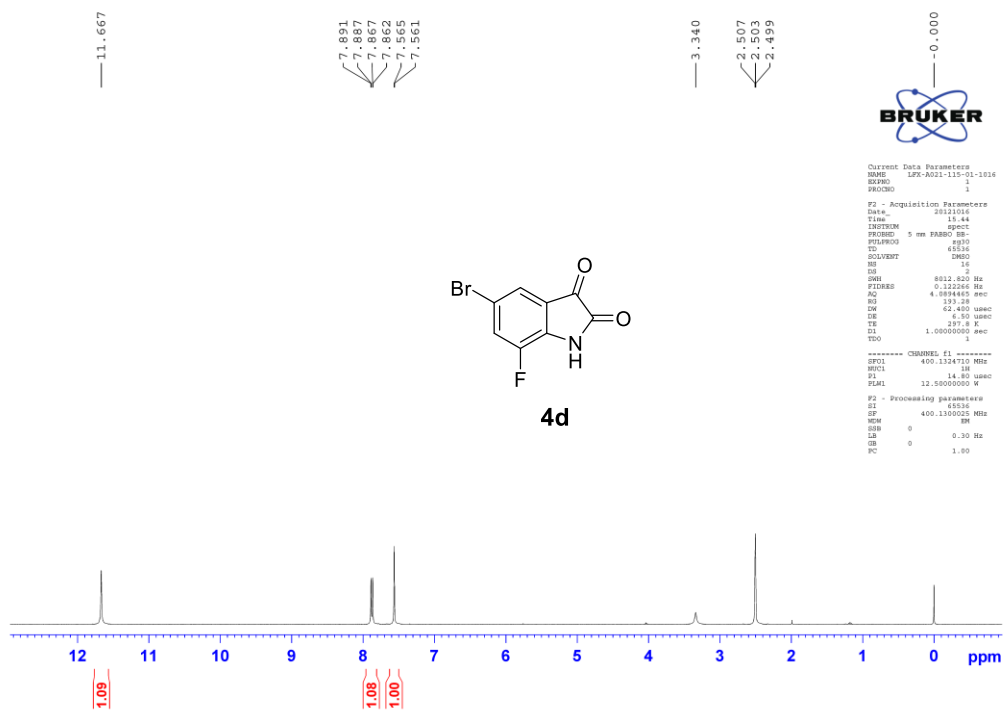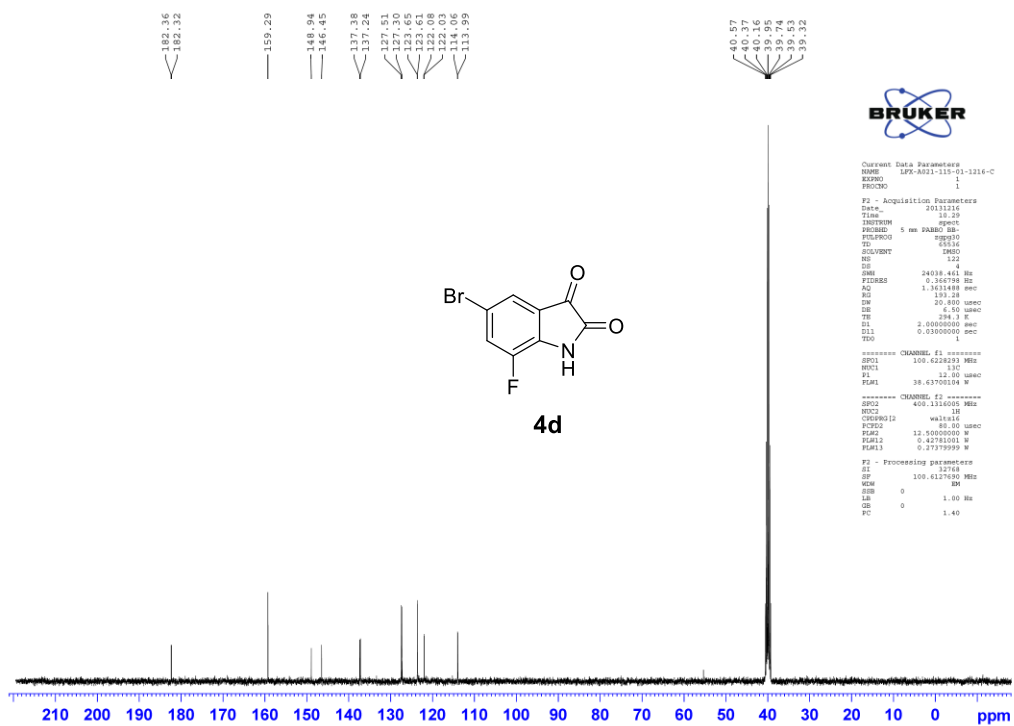



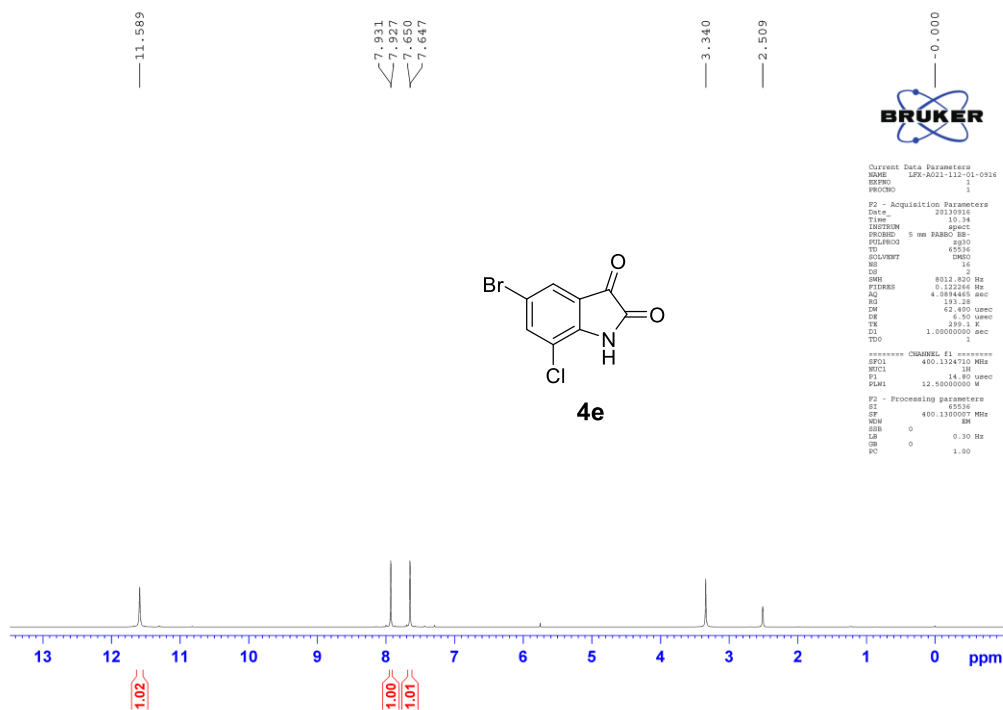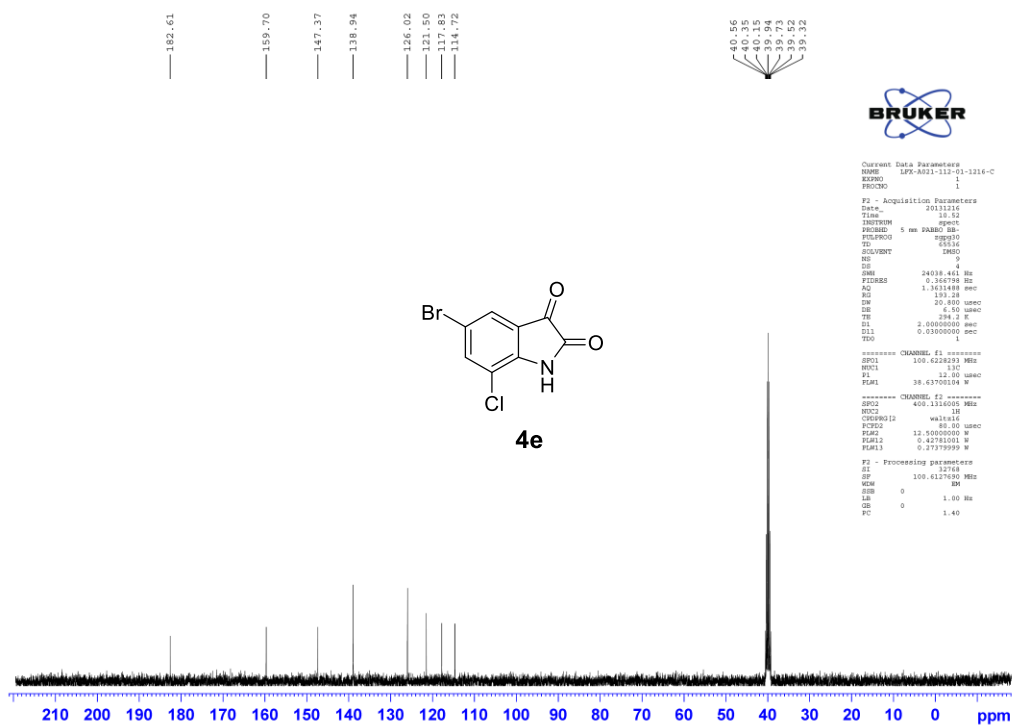



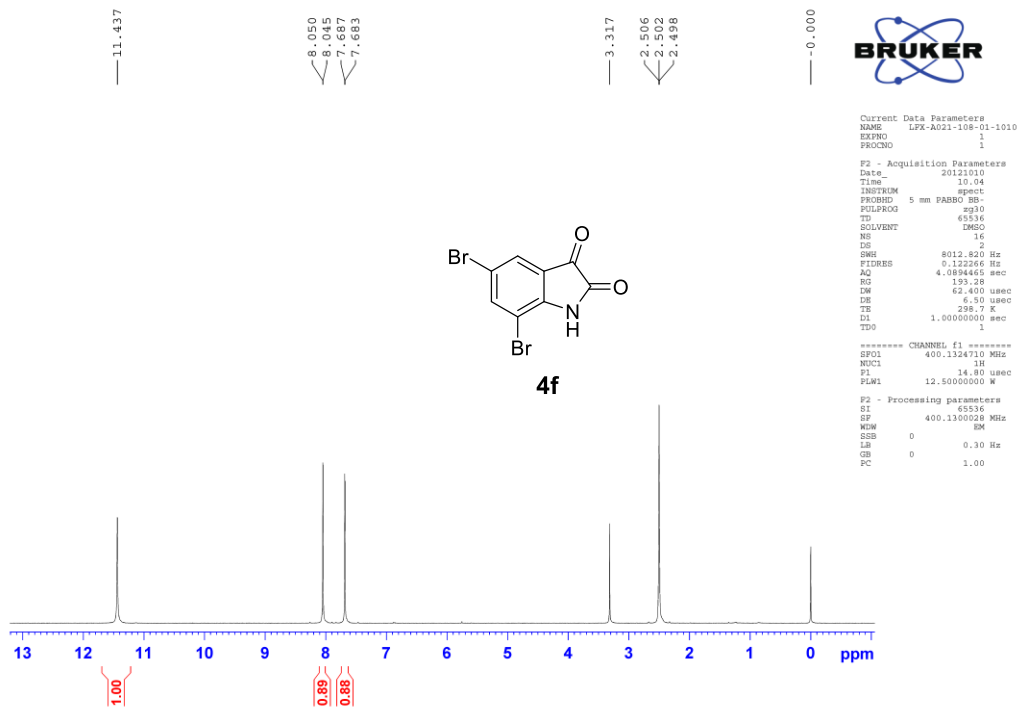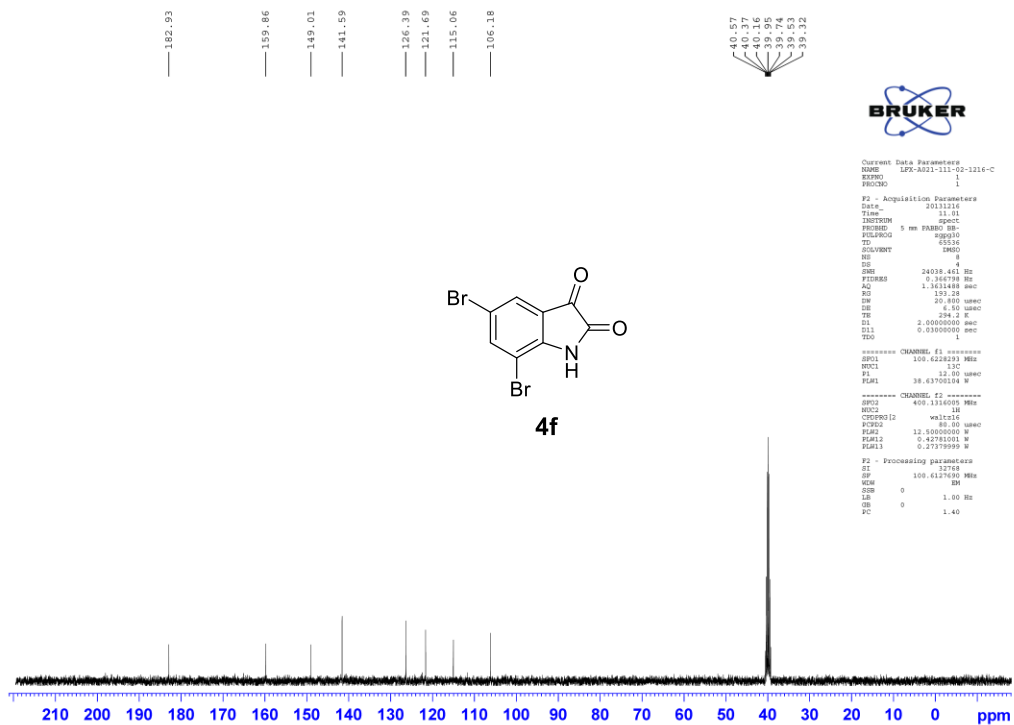



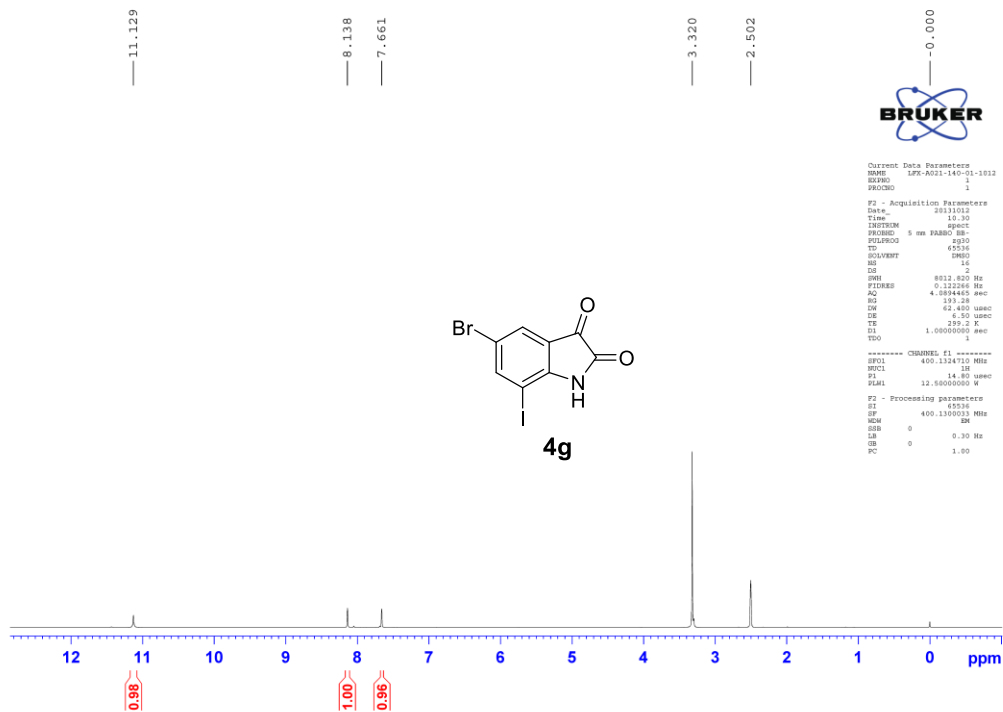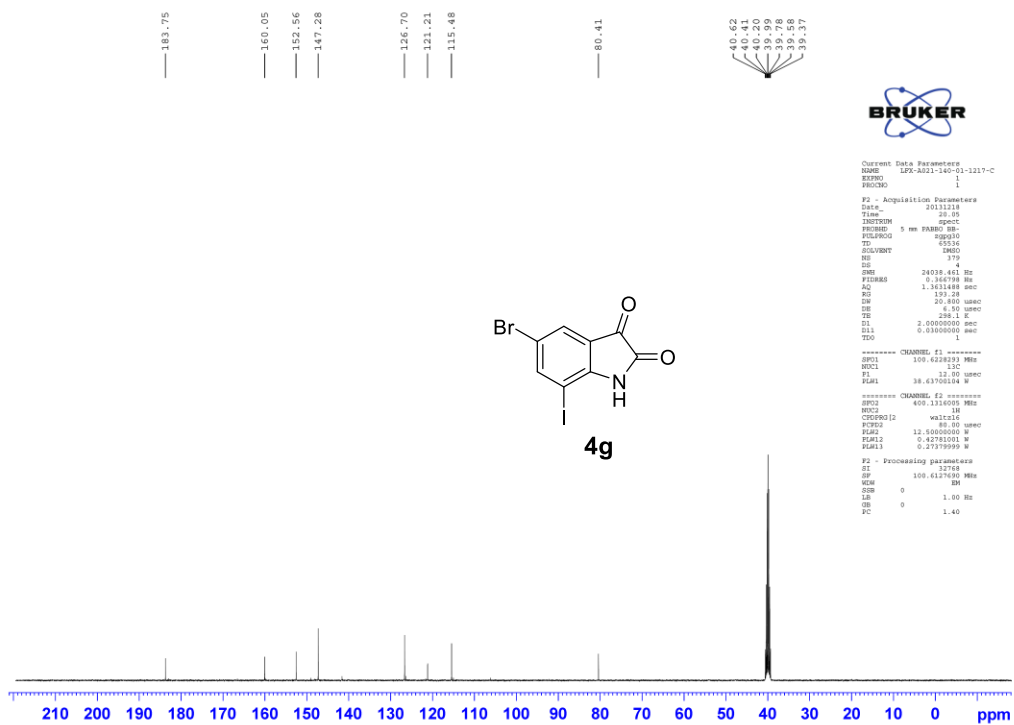



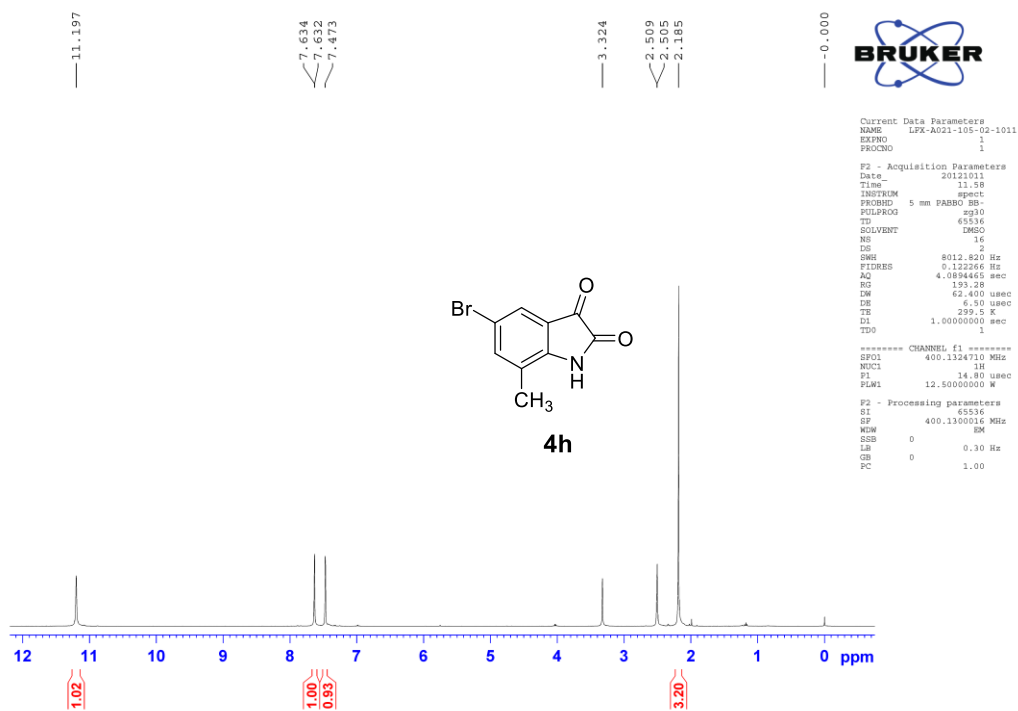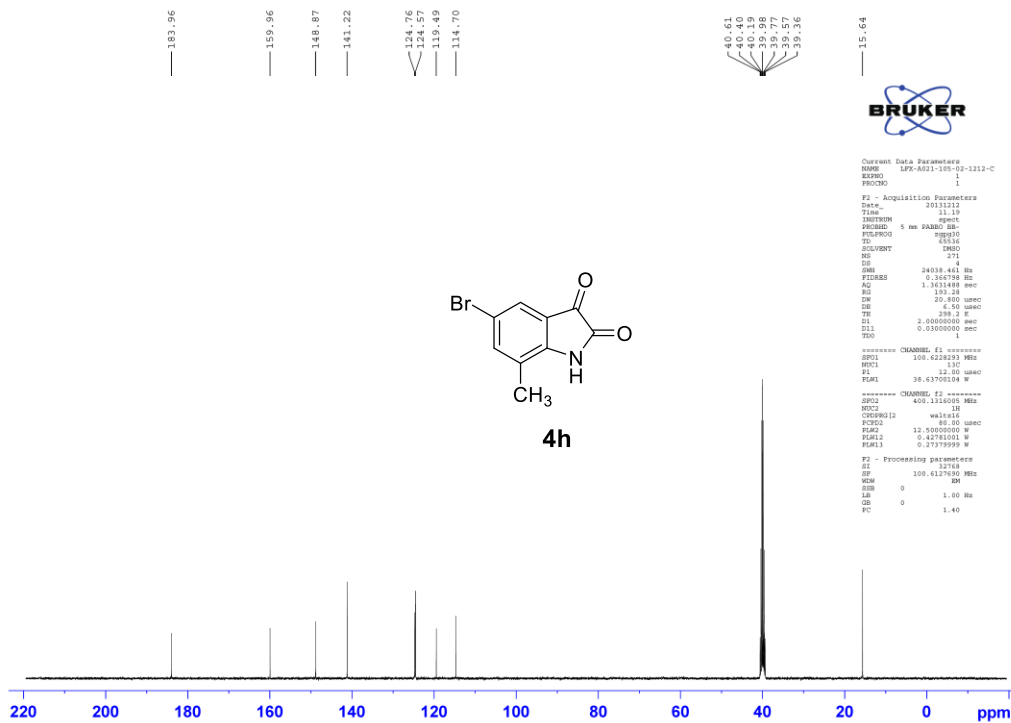



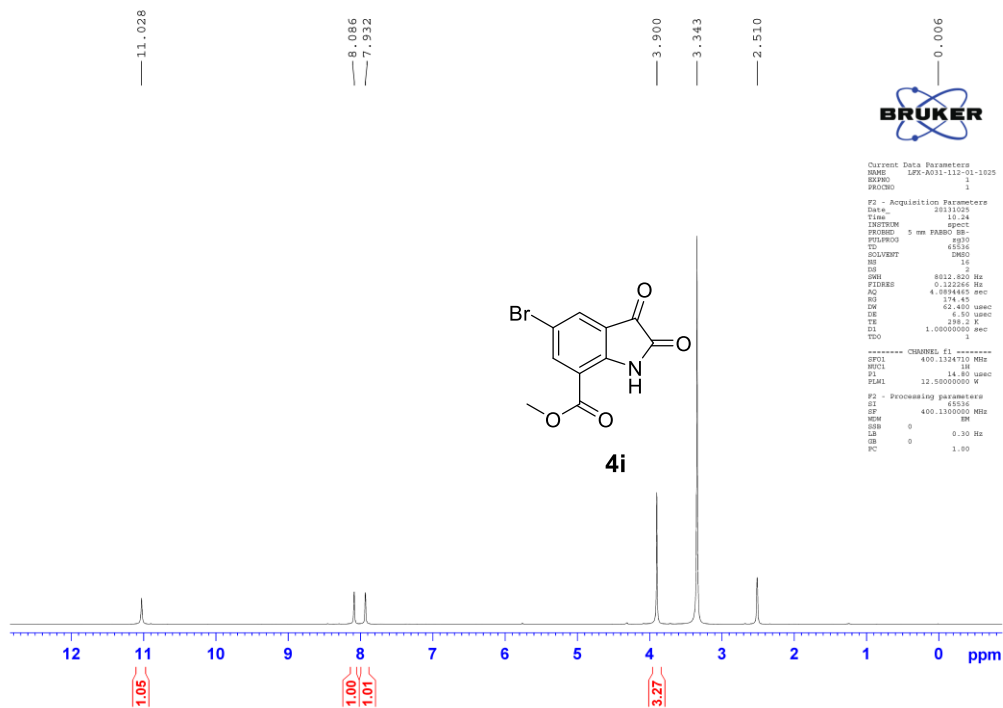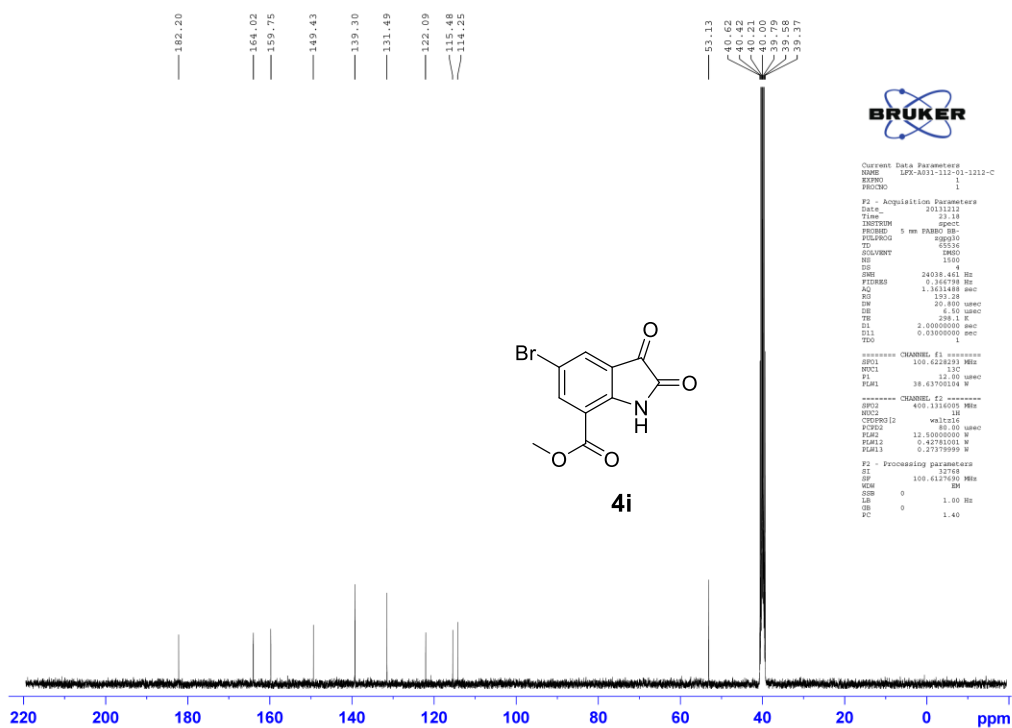







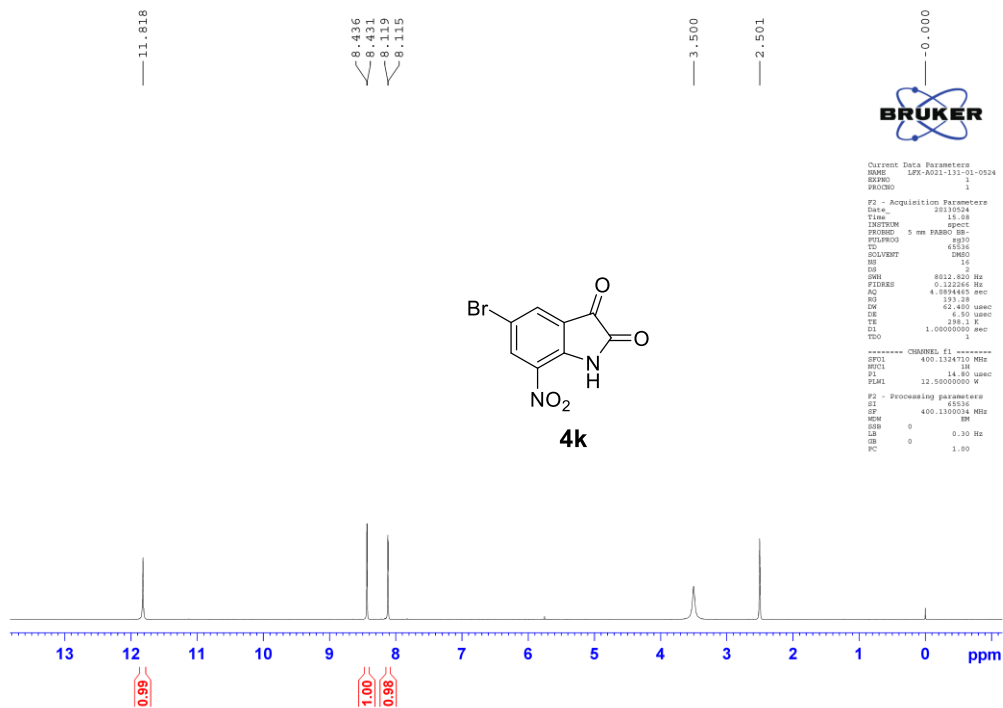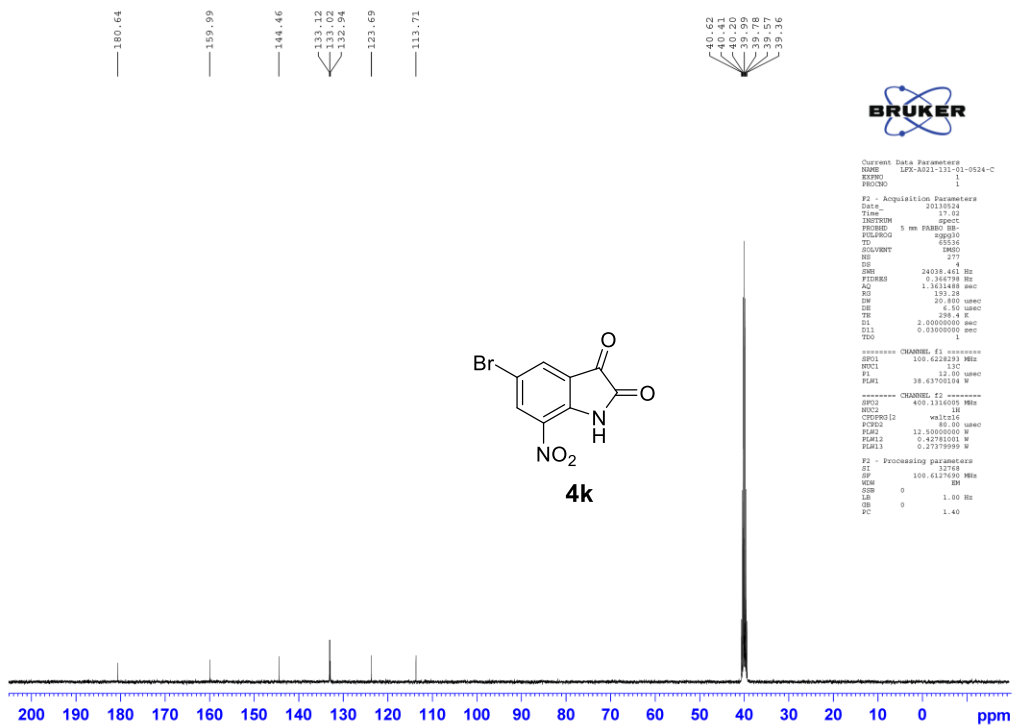







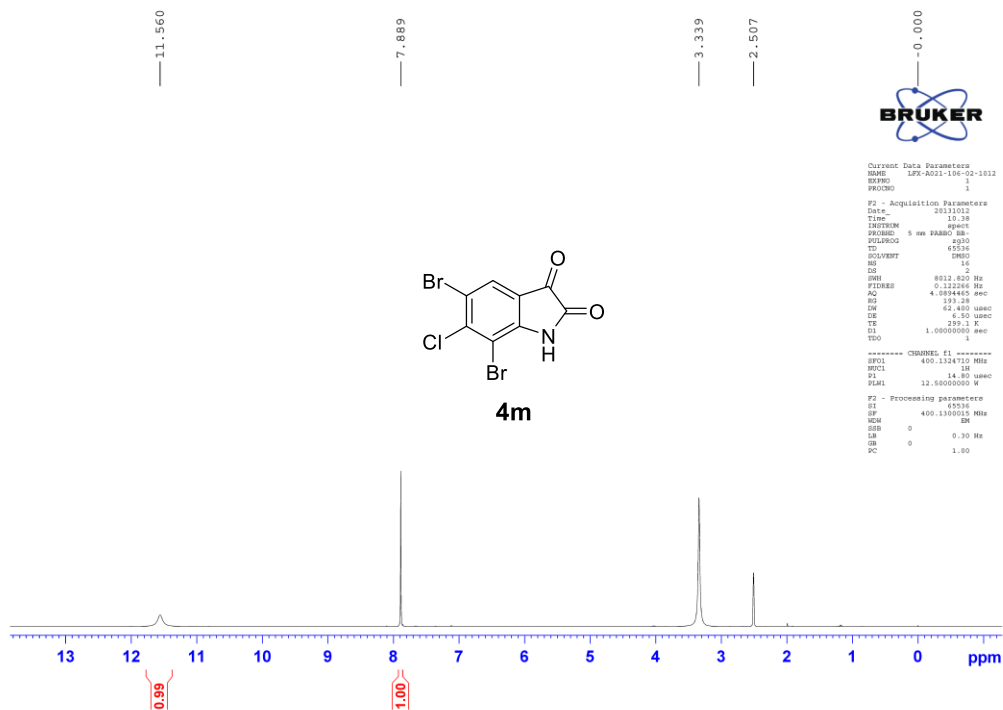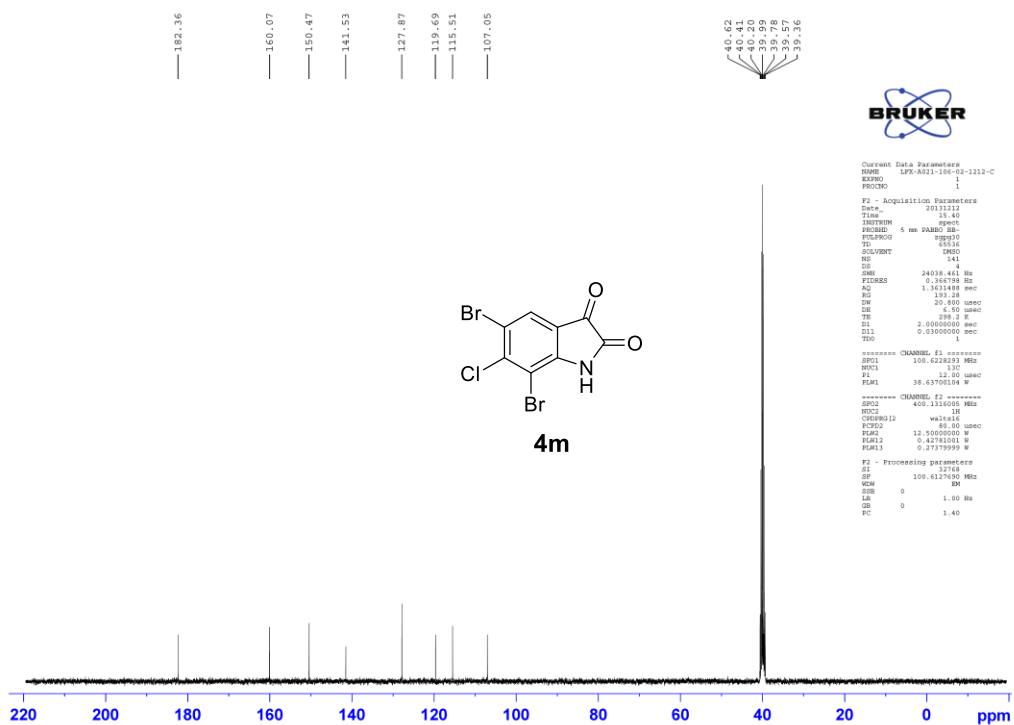



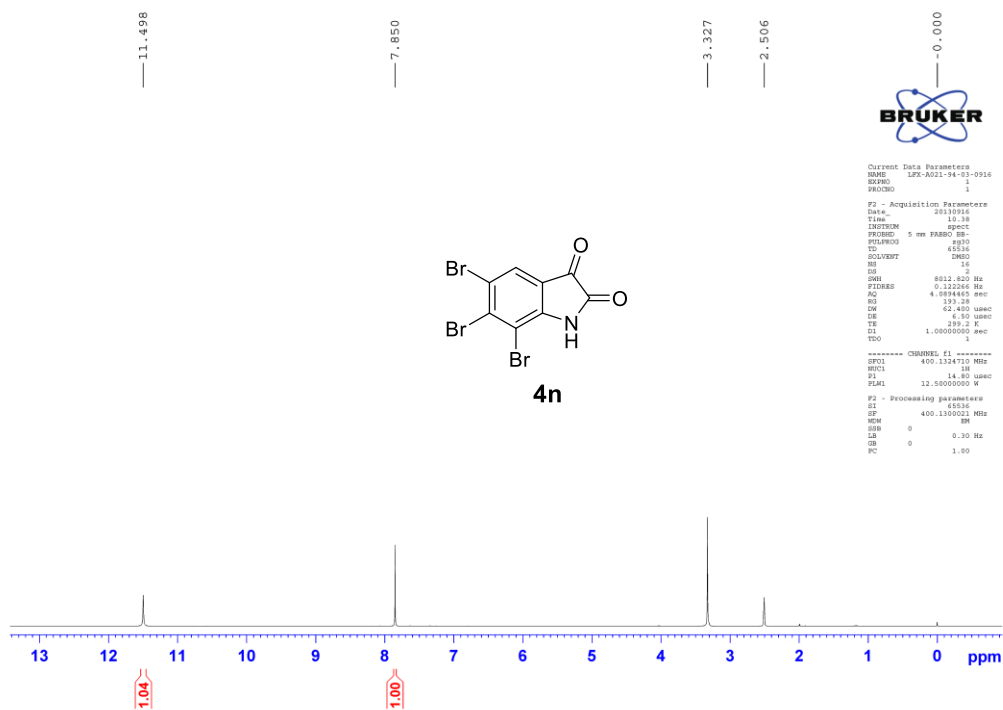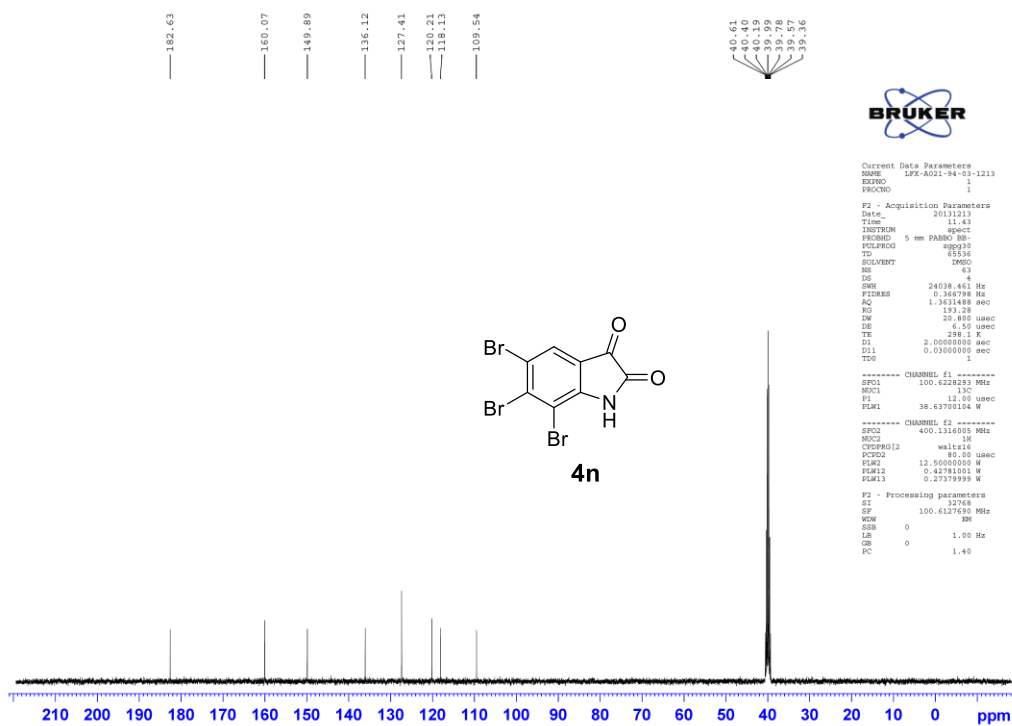



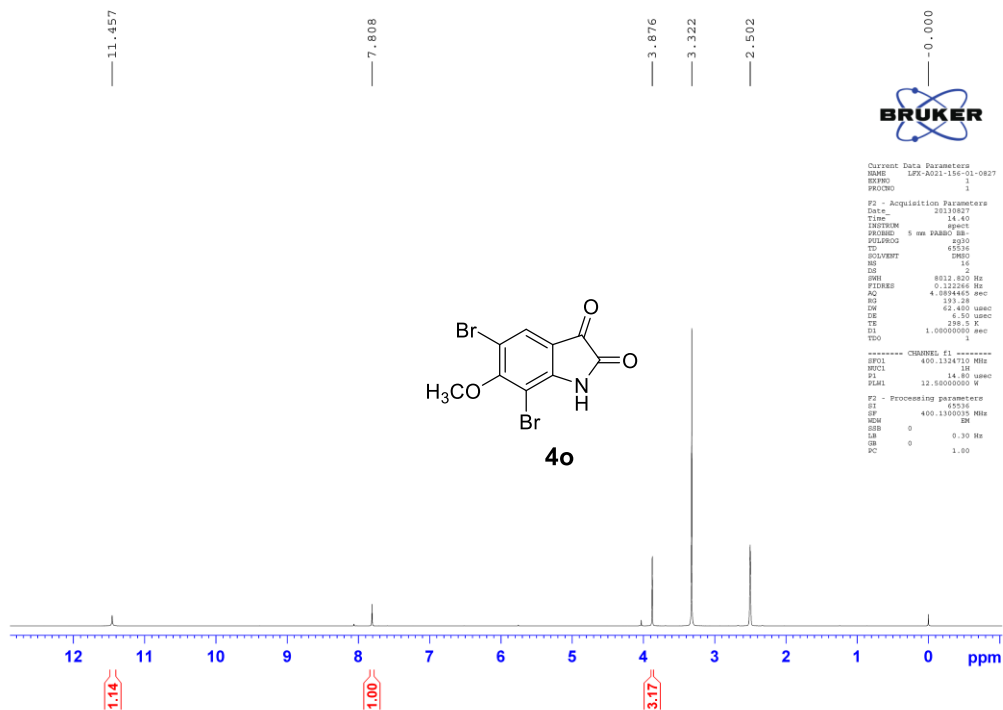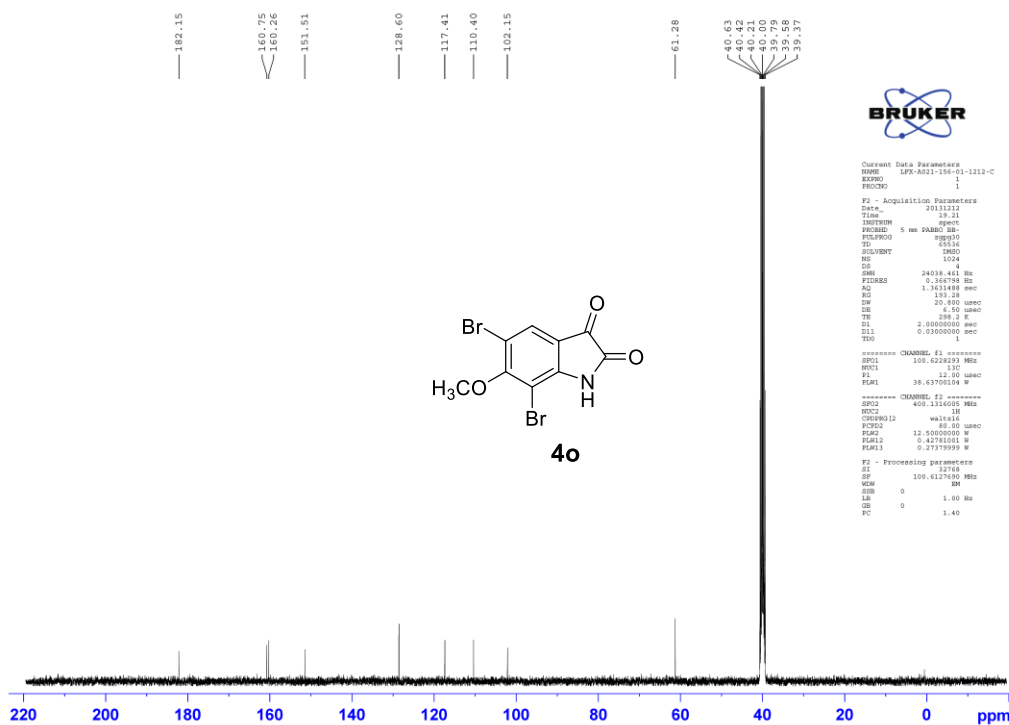



### 3. HR-MS Spectrum Data of compound 4l,4m,4o.

**PDF Complete**  
Your complimentary use period has ended.  
Thank you for using PDF Complete.  
[Click Here to upgrade to Unlimited Pages and Expanded Features](#)

Page 1 of 1

|    | Val. | Min | Max | Elmt | Val. | Min | Max | Use Adduct |
|----|------|-----|-----|------|------|-----|-----|------------|
| 2H | 1    | 0   | 0   | F    | 1    | 0   | 0   | H          |
| C  | 4    | 0   | 8   | Na   | 1    | 0   | 0   | HCOO       |
| N  | 3    | 0   | 1   | Si   | 4    | 0   | 0   | CH3COO     |
| O  | 2    | 0   | 2   | P    | 3    | 0   | 0   | Cl         |

  

|                          |                       |                     |
|--------------------------|-----------------------|---------------------|
| Error Margin (ppm): 9999 | DBE Range: 0.0 - 50.0 | Electron Ions: both |
| HC Ratio: unlimited      | Apply N Rule: no      | Use MSn Info: yes   |
| Max Isotopes: all        | Isotope RI (%): 1.00  | Isotope Res: 10000  |
| MSn Iso RI (%): 75.00    | MSn Logic Mode: AND   | Max Results: 100    |

Event#: 2 MS(E-) Ret. Time : 1.187 Scan#: 180

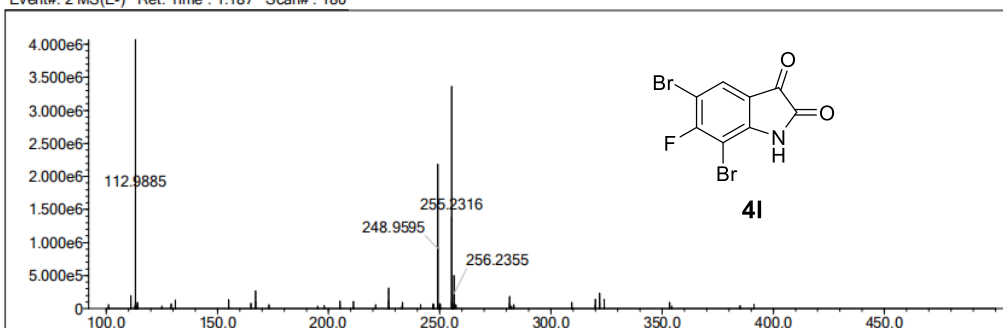

Measured region for 319.8339 m/z

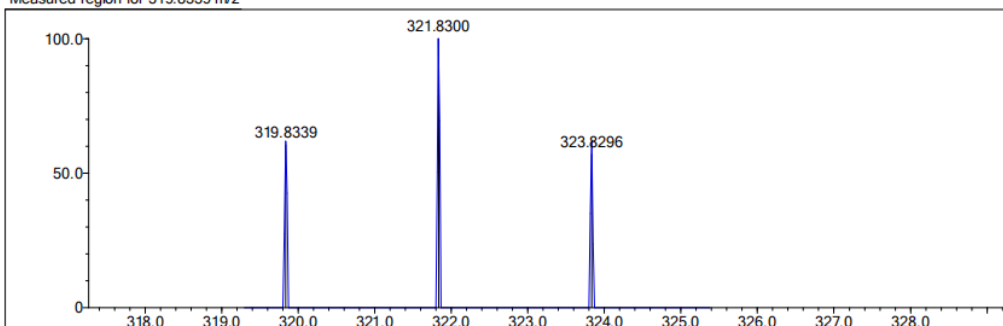

C8 H2 N O2 F Br2 [M-H]- : Predicted region for 319.8364 m/z

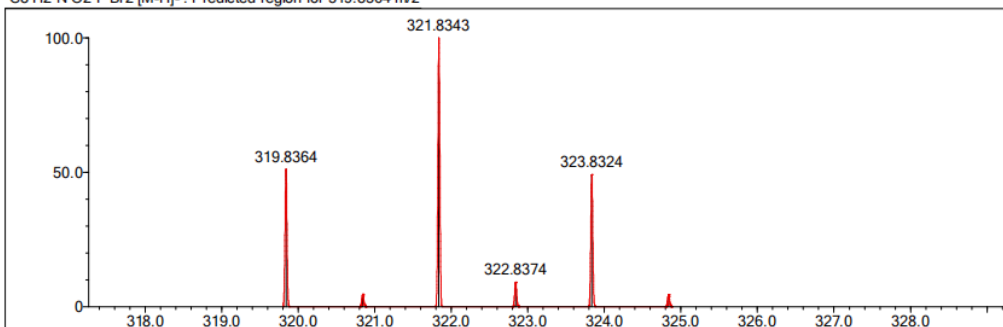

| Rank | Score | Formula (M)      | Ion    | Meas. m/z | Pred. m/z | Df. (mDa) | Df. (ppm) | Iso   | DBE |
|------|-------|------------------|--------|-----------|-----------|-----------|-----------|-------|-----|
| 2    | 28.98 | C8 H2 N O2 F Br2 | [M-H]- | 319.8339  | 319.8364  | -2.5      | -7.82     | 46.89 | 7.0 |



**PDF Complete**  
Your complimentary use period has ended.  
Thank you for using PDF Complete.  
[Click Here to upgrade to Unlimited Pages and Expanded Features](#)

|    | Val. | Min | Max | Elmt | Val. | Min | Max | Use Adduct |
|----|------|-----|-----|------|------|-----|-----|------------|
| 2H | 1    | 0   | 0   | F    | 1    | 0   | 0   | H          |
| C  | 4    | 0   | 9   | Na   | 1    | 0   | 0   | HCOO       |
| N  | 3    | 0   | 1   | Si   | 4    | 0   | 0   | CH3COO     |
| O  | 2    | 0   | 3   | P    | 3    | 0   | 0   | Cl         |
|    |      |     |     | Cl   | 1    | 0   | 0   |            |
|    |      |     |     | Se   | 2    | 0   | 0   |            |
|    |      |     |     | Br   | 1    | 0   | 2   |            |
|    |      |     |     | I    | 3    | 0   | 0   |            |
|    |      |     |     | Pt   | 2    | 0   | 0   |            |
|    |      |     |     | Ni   | 2    | 0   | 0   |            |

Error Margin (ppm): 9999 DBE Range: 0.0 - 50.0  
 HC Ratio: unlimited Apply N Rule: no Electron Ions: both  
 Max Isotopes: all Isotope RI (%): 1.00 Use MSn Info: yes  
 MSn Iso RI (%): 75.00 MSn Logic Mode: AND Isotope Res: 10000  
 Max Results: 100

Event#: 2 MS(E-) Ret. Time : 1.120 Scan#: 170

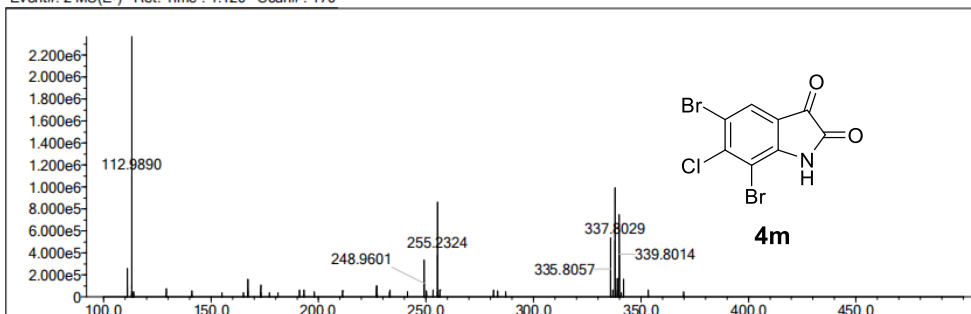

Measured region for 335.8049 m/z

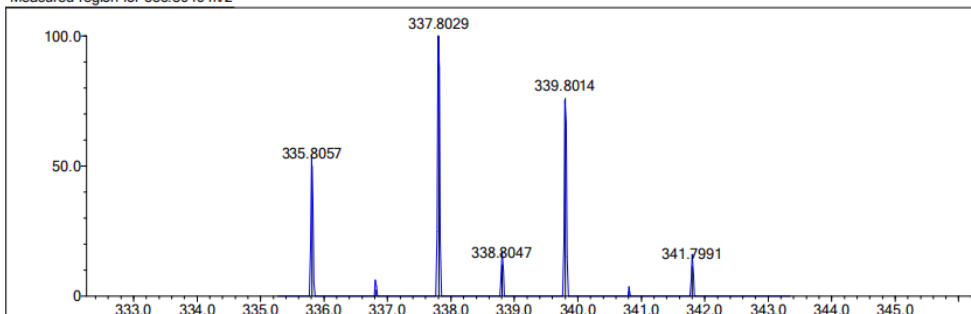

C8 H N O2 Br2 [M+Cl]- : Predicted region for 335.8068 m/z

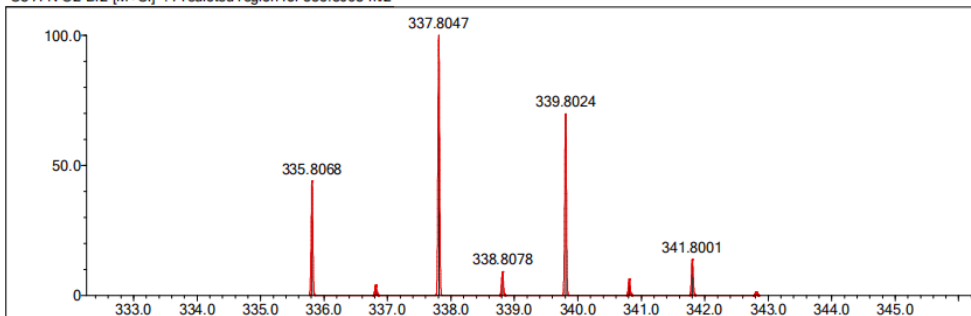

| Rank | Score | Formula (M)   | Ion     | Meas. m/z | Pred. m/z | Df. (mDa) | Df. (ppm) | Iso   | DBE |
|------|-------|---------------|---------|-----------|-----------|-----------|-----------|-------|-----|
| 1    | 70.53 | C8 H N O2 Br2 | [M+Cl]- | 335.8049  | 335.8068  | -1.9      | -5.66     | 84.57 | 8.0 |



**PDF Complete**  
 Your complimentary use period has ended.  
 Thank you for using PDF Complete.  
[Click Here to upgrade to Unlimited Pages and Expanded Features](#)

|    | Val. | Min | Max | Elmt | Val. | Min | Max | Use Adduct |
|----|------|-----|-----|------|------|-----|-----|------------|
| 2H | 1    | 0   | 0   | F    | 1    | 0   | 0   | H          |
| C  | 4    | 0   | 9   | Na   | 1    | 0   | 0   | HCOO       |
| N  | 3    | 0   | 1   | Si   | 4    | 0   | 0   | CH3COO     |
| O  | 2    | 0   | 3   | P    | 3    | 0   | 0   | Cl         |

Error Margin (ppm): 9999

DBE Range: 0.0 - 50.0

Electron Ions: both

HC Ratio: unlimited

Apply N Rule: no

Use MSn Info: yes

Max Isotopes: all

Isotope RI (%): 1.00

Isotope Res: 10000

MSn Iso RI (%): 75.00

MSn Logic Mode: AND

Max Results: 100

Event#: 2 MS(E-) Ret. Time : 1.067 -> 1.067 Scan#: 162 -> 162

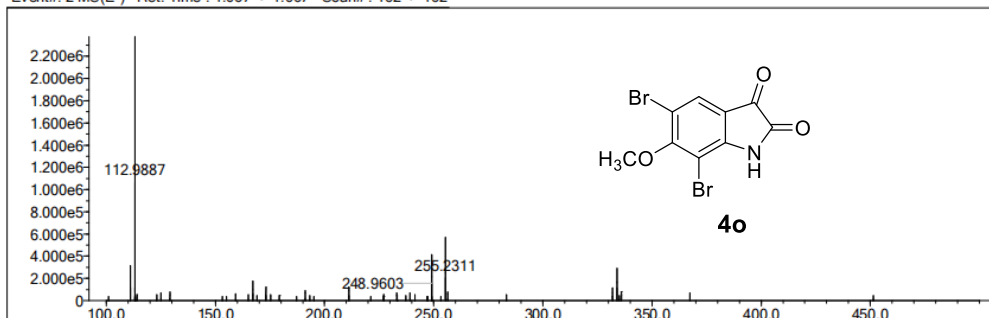

Measured region for 331.8547 m/z

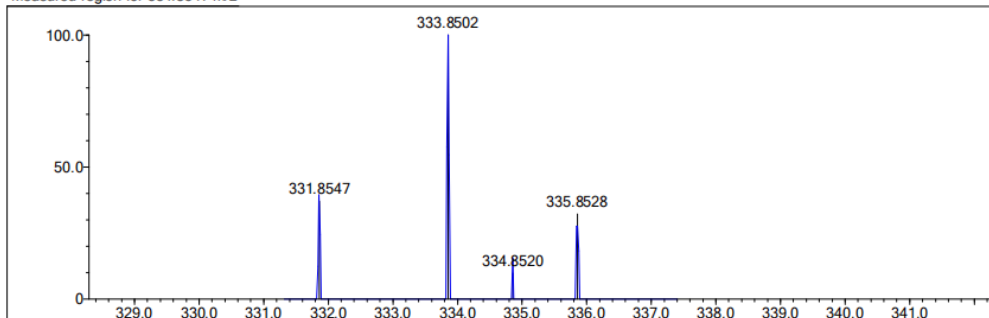

C9 H5 N O3 Br2 [M-H]- : Predicted region for 331.8563 m/z

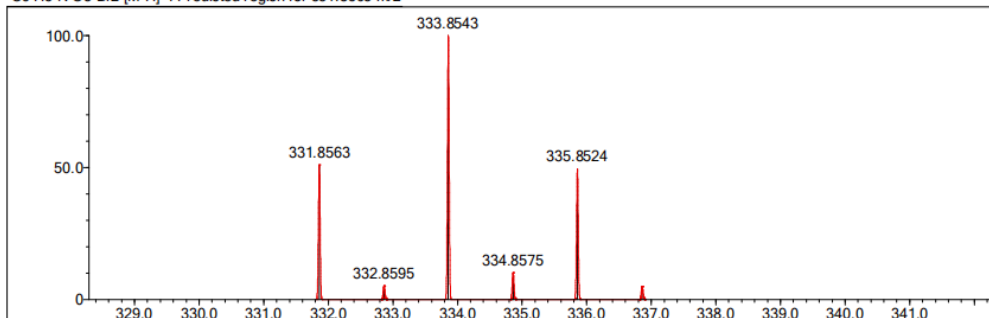

| Rank | Score | Formula (M)    | Ion    | Meas. m/z | Pred. m/z | Df. (mDa) | Df. (ppm) | Iso   | DBE |
|------|-------|----------------|--------|-----------|-----------|-----------|-----------|-------|-----|
| 1    | 36.64 | C9 H5 N O3 Br2 | [M-H]- | 331.8547  | 331.8563  | -1.6      | -4.82     | 40.51 | 7.0 |
